# Supplementary material for: Bactericidal Activity of Ceragenin in Combination with Ceftazidime, Levofloxacin, Co-Trimoxazole, and Colistin against the Opportunistic Pathogen Stenotrophomonas maltophilia
Source: MDPI journal article supplement (doi:10.3390/pathogens11060621), 2022-05-26
Supplement: s1 [file s1]

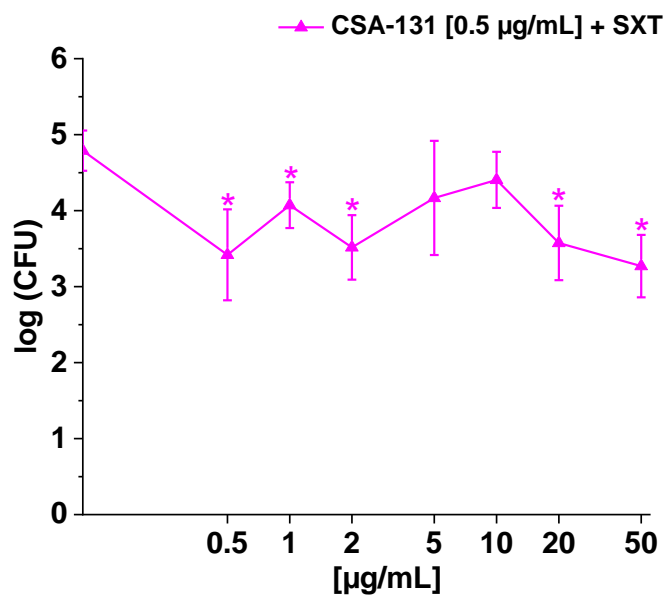

Figure S1. Killing activities of CSA-131 and SXT studied at with 0.5 and 0.5-50 µg/mL respectively, against *S. maltophilia* strain 1 was determined using a standard colony counting assay. Results show mean±SD from six measurements. \* indicates statistical significance at ≤0.05, \*\* ≤0.01, and \*\*\* ≤0.001.

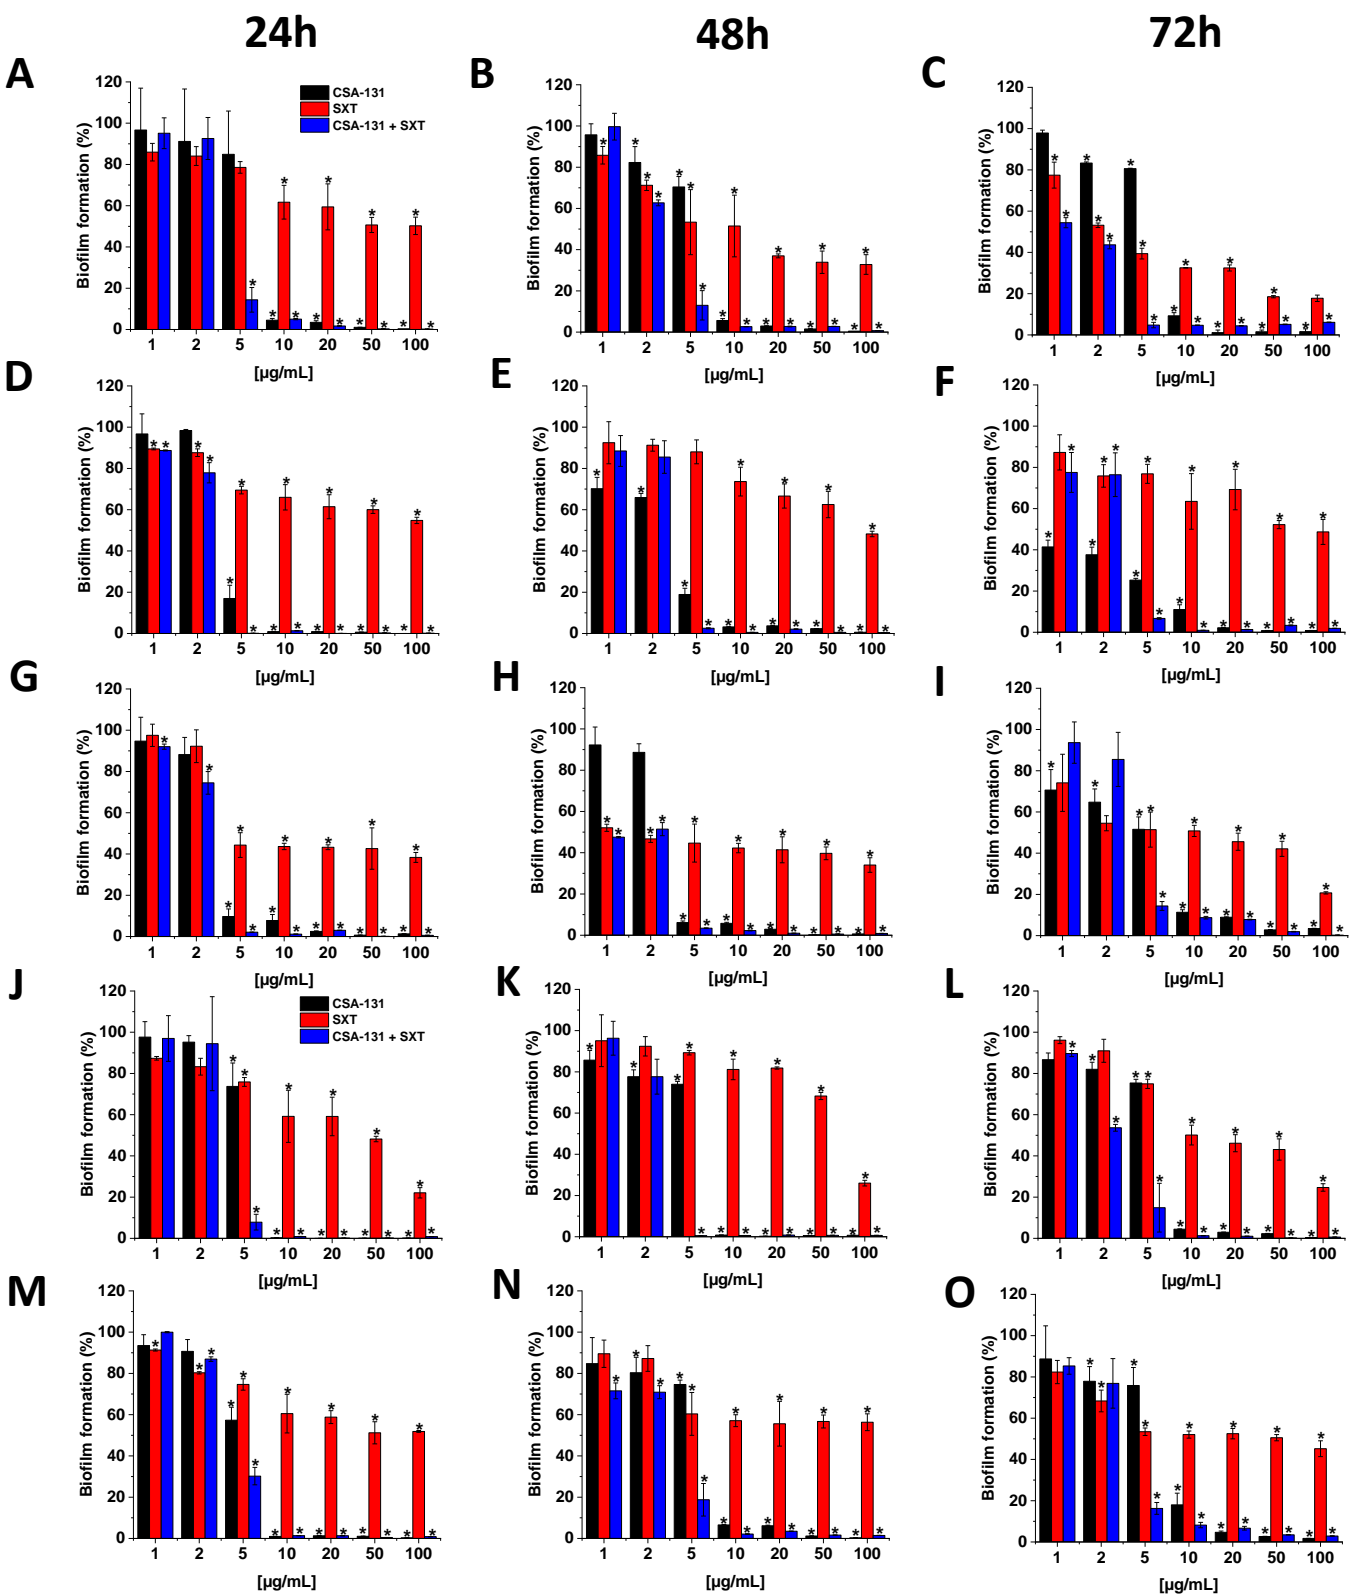

Figure S2. Prevention of biofilm formation by *S. maltophilia* strain 1 (panels A-C), strain 2 (panels D-F), strain 3 (panels G-I) strain 4 (panels J-L), strain 5 (panels M-O) during treatment with CSA-131, SXT, and CSA-131+SXT. Formation of biofilm in the presence of tested compounds at concentration ranging 1–100 µg/mL was assessed using the resazurin-based fluorimetric method after 24, 48, and 72 hours incubation. Results show mean±SD from 3–6 measurements. \* indicates statistical significance  $\leq 0.05$ , \*\*  $\leq 0.01$ , and \*\*\*  $\leq 0.001$

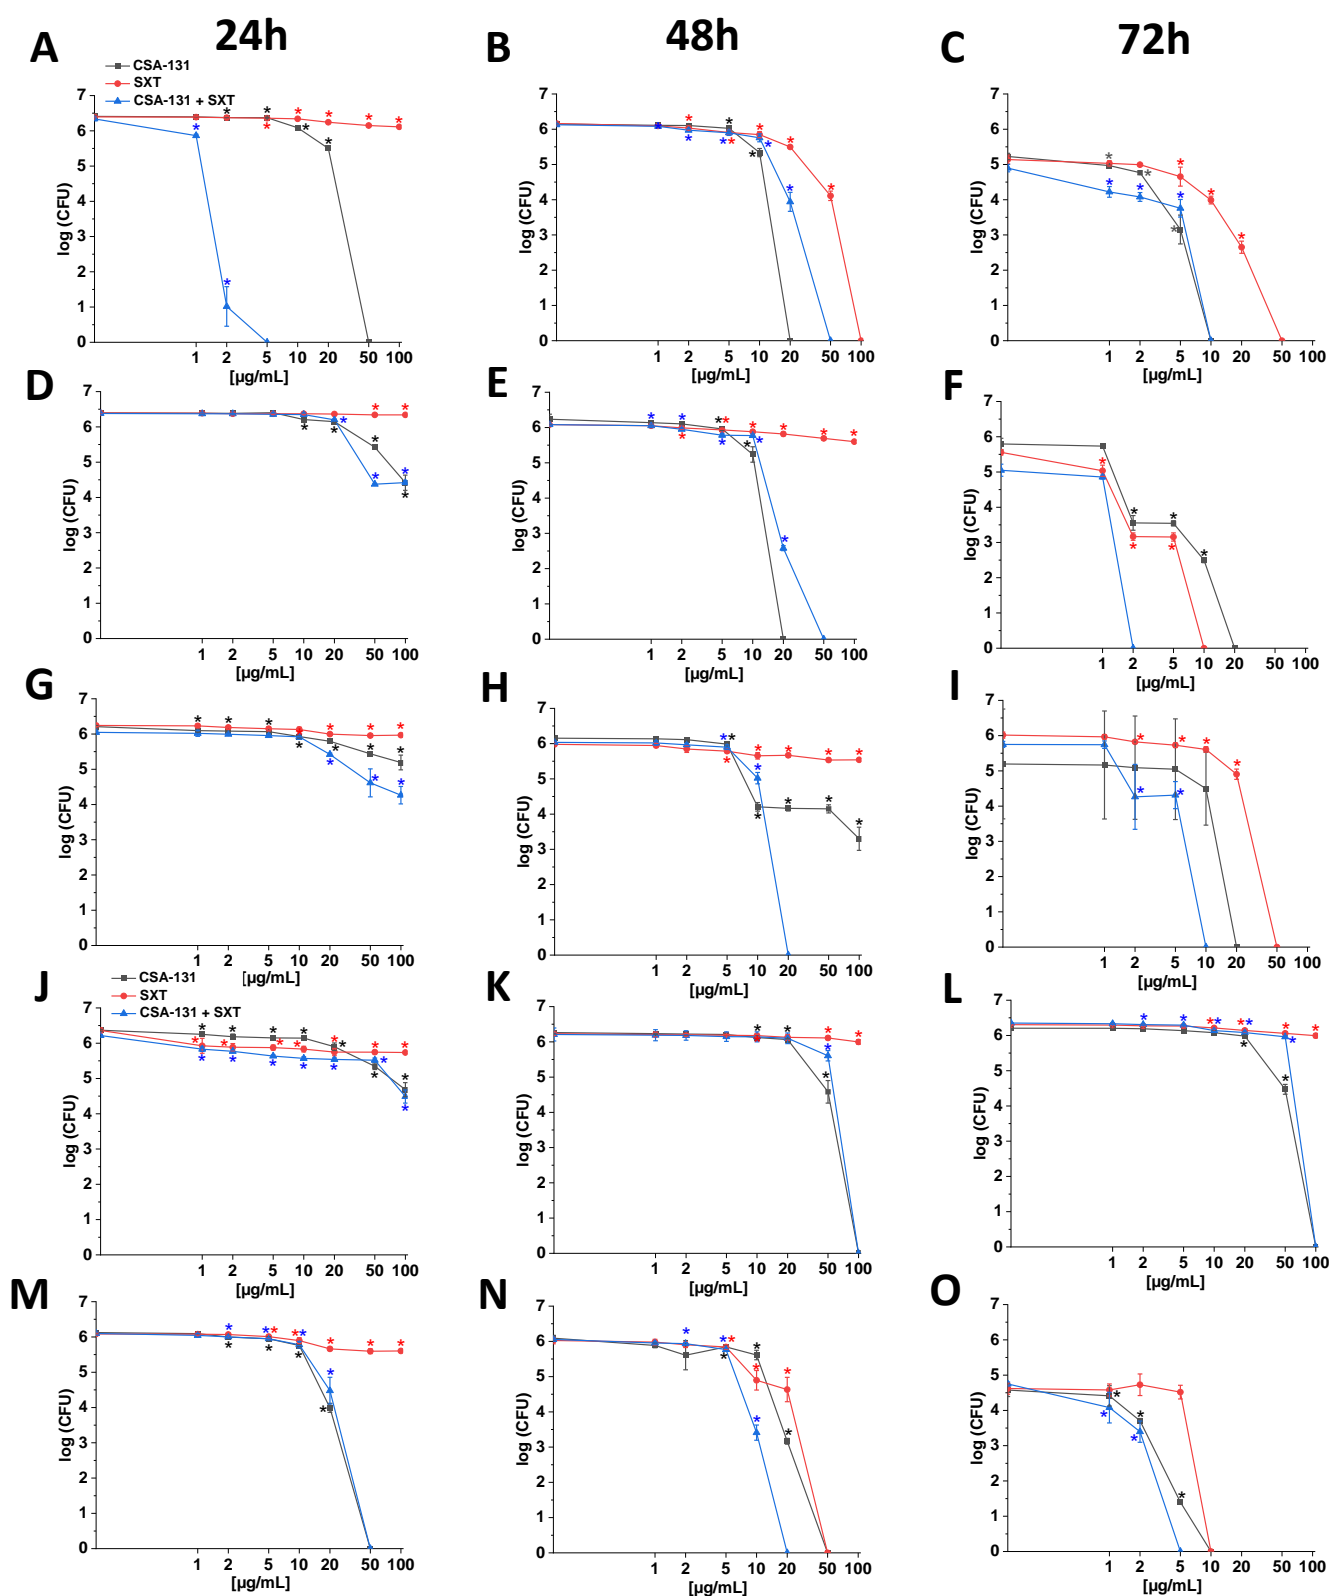

Figure S3. Disruption of the biofilms formed by *Stenotrophomonas maltophilia* strain 1 (panels A–C), strain 2 (panels D–F), strain 3 (panels G–I) 4 (panels J–L) and strain 5 (panels M–O), upon treatment with CSA-131, SXT, and CSA-131+SXT. Bacteria outgrow at 24, 48, and 72 hours from biofilm treated with tested agents at concentration 1–100  $\mu\text{g/mL}$ . Results show mean $\pm$ SD from 3–6 measurements. \* indicates statistical significance  $\leq 0.05$ , \*\*  $\leq 0.01$ , and \*\*\*  $\leq 0.001$ .
